# Supplementary material for: Contextual work design and employee innovative work behavior: When does autonomy matter?
Source: PubMed Central journal article supplement (PMC6171839; doi:10.1371/journal.pone.0204089), 2018-10-04
Supplement: pone.0204089.s001.pdf [file pone.0204089.s001.pdf]

1 **S1 Table. HLM results for full all respondents (N = 2,550).**

| Level and Variable                             | Model         |                                  |                                   |                         |
|------------------------------------------------|---------------|----------------------------------|-----------------------------------|-------------------------|
|                                                | Null          | Random Intercept and Fixed Slope | Random Intercept and Random Slope | Cross-Level Interaction |
| <b>Level 1</b>                                 |               |                                  |                                   |                         |
| Intercept                                      | 4.47*** (.02) | 4.47*** (.02)                    | 4.47*** (.02)                     | 4.47*** (.02)           |
| Work scheduling autonomy                       |               | .29*** (.01)                     | .29*** (.01)                      | .29*** (.01)            |
| Work methods autonomy                          |               | .32*** (.01)                     | .32*** (.01)                      | .32*** (.01)            |
| Decision-making autonomy                       |               | .22*** (.01)                     | .22*** (.01)                      | .22*** (.01)            |
| Organizational openness                        |               | .25*** (.01)                     | .25*** (.01)                      | .25*** (.01)            |
| Participation in decision-making               |               | .24*** (.01)                     | .24*** (.01)                      | .24*** (.01)            |
| Formalization                                  |               | .20*** (.01)                     | .20*** (.01)                      | .20*** (.01)            |
| <b>Level 2 (Intercept)</b>                     |               |                                  |                                   |                         |
| Supervisor support                             |               | .01 (.04)                        | .04 (.04)                         | .03 (.04)               |
| Organizational innovation                      |               | .33** (.04)                      | .29** (.04)                       | .31** (.04)             |
| Organizational structure                       |               | .07* (.03)                       | .10** (.04)                       | .09* (.04)              |
| <b>Cross-level interactions</b>                |               |                                  |                                   |                         |
| Work scheduling autonomy                       |               |                                  |                                   |                         |
| × Supervisor support                           |               |                                  |                                   | -.01 (.03)              |
| × Organizational innovation                    |               |                                  |                                   | -.03 (.03)              |
| × Organizational structure                     |               |                                  |                                   | .06* (.03)              |
| Work methods autonomy                          |               |                                  |                                   |                         |
| × Supervisor support                           |               |                                  |                                   | .03 (.03)               |
| × Organizational innovation                    |               |                                  |                                   | -.06* (.03)             |
| × Organizational structure                     |               |                                  |                                   | .03 (.03)               |
| Decision-making autonomy                       |               |                                  |                                   |                         |
| × Supervisor support                           |               |                                  |                                   | .02 (.02)               |
| × Organizational innovation                    |               |                                  |                                   | -.02 (.02)              |
| × Organizational structure                     |               |                                  |                                   | .03 (.02)               |
| <b>Variance components</b>                     |               |                                  |                                   |                         |
| Intercept                                      | .74***        | .71***                           | .75***                            | .75***                  |
| Work scheduling autonomy                       |               |                                  | .31***                            | .31***                  |
| Work methods autonomy                          |               |                                  | .22***                            | .22***                  |
| Decision-making autonomy                       |               |                                  | .14***                            | .14***                  |
| Organizational openness                        |               |                                  | .16***                            | .16***                  |
| Participation in decision-making               |               |                                  | .18***                            | .18***                  |
| Formalization                                  |               |                                  | .12***                            | .12***                  |
| <b>Additional information</b>                  |               |                                  |                                   |                         |
| ICC                                            | .46           |                                  |                                   |                         |
| -2 log likelihood FIML                         | 60381         | 57787                            | 55029                             | 55007                   |
| Number of estimated parameters                 | 3             | 12                               | 39                                | 48                      |
| Model comparison $\chi^2$ (Degrees of Freedom) |               |                                  | 2757.26 (27)***                   | 2779.79(36)***          |

2 *Note:* ICC = Intraclass correlation; FIML = full information maximum likelihood estimation; L1  
3 = Level 1; L2 = Level 2. L1  $N = 20,400$  and L2 sample size = 2,550. Values in parentheses are  
4 standard errors. \*  $p < .05$ , \*\*  $p < .01$ , \*\*\*  $p < .001$ .
