# Supplementary material for: Contextual work design and employee innovative work behavior: When does autonomy matter?
Source: PubMed Central journal article supplement (PMC6171839; doi:10.1371/journal.pone.0204089), 2018-10-04
Supplement: pone.0204089.s002.pdf [file pone.0204089.s002.pdf]

1 **S2 Table. HLM results for “Services” (n = 472).**

| Level and Variable                             | Model         |                                  |                                   |                         |
|------------------------------------------------|---------------|----------------------------------|-----------------------------------|-------------------------|
|                                                | Null          | Random Intercept and Fixed Slope | Random Intercept and Random Slope | Cross-Level Interaction |
| <b>Level 1</b>                                 |               |                                  |                                   |                         |
| Intercept                                      | 4.34*** (.04) | 4.34*** (.04)                    | 4.34*** (.04)                     | 4.34*** (.04)           |
| Work scheduling autonomy                       |               | .58*** (.04)                     | .58*** (.04)                      | .58*** (.04)            |
| Work methods autonomy                          |               | .59*** (.04)                     | .59*** (.04)                      | .59*** (.04)            |
| Decision-making autonomy                       |               | .44*** (.03)                     | .44*** (.03)                      | .44*** (.03)            |
| Organizational openness                        |               | .47*** (.03)                     | .47*** (.03)                      | .47*** (.03)            |
| Participation in decision-making               |               | .43*** (.04)                     | .43*** (.04)                      | .43*** (.04)            |
| Formalization                                  |               | .39*** (.03)                     | .39*** (.03)                      | .39*** (.03)            |
| <b>Level 2 (Intercept)</b>                     |               |                                  |                                   |                         |
| Supervisor support                             |               | -.04 (.08)                       | -.02 (.08)                        | -.01 (.08)              |
| Organizational innovation                      |               | .28** (.09)                      | .26** (.09)                       | .26** (.09)             |
| Organizational structure                       |               | .11 (.07)                        | .08 (.07)                         | .08 (.07)               |
| <b>Cross-level interactions</b>                |               |                                  |                                   |                         |
| Work scheduling autonomy                       |               |                                  |                                   |                         |
| × Supervisor support                           |               |                                  |                                   | .03 (.07)               |
| × Organizational innovation                    |               |                                  |                                   | -.06 (.09)              |
| × Organizational structure                     |               |                                  |                                   | -.04 (.09)              |
| Work methods autonomy                          |               |                                  |                                   |                         |
| × Supervisor support                           |               |                                  |                                   | -.02 (.08)              |
| × Organizational innovation                    |               |                                  |                                   | -.07 (.08)              |
| × Organizational structure                     |               |                                  |                                   | .03 (.07)               |
| Decision-making autonomy                       |               |                                  |                                   |                         |
| × Supervisor support                           |               |                                  |                                   | -.05 (.07)              |
| × Organizational innovation                    |               |                                  |                                   | .10 (.07)               |
| × Organizational structure                     |               |                                  |                                   | .03 (.05)               |
| <b>Variance components</b>                     |               |                                  |                                   |                         |
| Intercept                                      | .53***        | .56***                           | .62***                            | .62***                  |
| Work scheduling autonomy                       |               |                                  | .42***                            | .42***                  |
| Work methods autonomy                          |               |                                  | .37***                            | .37***                  |
| Decision-making autonomy                       |               |                                  | .22***                            | .22***                  |
| Organizational openness                        |               |                                  | .23***                            | .23***                  |
| Participation in decision-making               |               |                                  | .29***                            | .29***                  |
| Formalization                                  |               |                                  | .17***                            | .17***                  |
| <b>Additional information</b>                  |               |                                  |                                   |                         |
| ICC                                            | .27           |                                  |                                   |                         |
| -2 log likelihood FIML                         | 12808         | 11712                            | 11277                             | 11269                   |
| Number of estimated parameters                 | 3             | 12                               | 39                                | 48                      |
| Model comparison $\chi^2$ (Degrees of Freedom) |               |                                  | 434.84 (27)***                    | 7.82 (9)                |

2 *Note:* ICC = Intraclass correlation; FIML = full information maximum likelihood estimation; L1  
3 = Level 1; L2 = Level 2. L1  $n = 3,776$  and L2 sample size = 472. Values in parentheses are  
4 standard errors. \*  $p < .05$ , \*\*  $p < .01$ , \*\*\*  $p < .001$ .
