# Supplementary material for: Contextual work design and employee innovative work behavior: When does autonomy matter?
Source: PubMed Central journal article supplement (PMC6171839; doi:10.1371/journal.pone.0204089), 2018-10-04
Supplement: pone.0204089.s003.pdf [file pone.0204089.s003.pdf]

1 **S3 Table. HLM results for “Manufacturing” (n = 193).**

| Level and Variable                             | Model         |                                  |                                   |                         |
|------------------------------------------------|---------------|----------------------------------|-----------------------------------|-------------------------|
|                                                | Null          | Random Intercept and Fixed Slope | Random Intercept and Random Slope | Cross-Level Interaction |
| <b>Level 1</b>                                 |               |                                  |                                   |                         |
| Intercept                                      | 4.31*** (.05) | 4.31*** (.05)                    | 4.31*** (.05)                     | 4.31*** (.05)           |
| Work scheduling autonomy                       |               | .57*** (.05)                     | .57*** (.05)                      | .57*** (.05)            |
| Work methods autonomy                          |               | .55*** (.05)                     | .55*** (.05)                      | .55*** (.05)            |
| Decision-making autonomy                       |               | .36*** (.05)                     | .36*** (.05)                      | .36*** (.05)            |
| Organizational openness                        |               | .44*** (.05)                     | .44*** (.05)                      | .44*** (.05)            |
| Participation in decision-making               |               | .41*** (.05)                     | .41*** (.05)                      | .41*** (.05)            |
| Formalization                                  |               | .39*** (.05)                     | .39*** (.05)                      | .39*** (.05)            |
| <b>Level 2 (Intercept)</b>                     |               |                                  |                                   |                         |
| Supervisor support                             |               | -.01 (.10)                       | .03 (.11)                         | .02 (.11)               |
| Organizational innovation                      |               | .06 (.12)                        | .00 (.12)                         | .03 (.12)               |
| Organizational structure                       |               | -.04 (.10)                       | .01 (.12)                         | -.02 (.12)              |
| <b>Cross-level interactions</b>                |               |                                  |                                   |                         |
| Work scheduling autonomy                       |               |                                  |                                   |                         |
| × Supervisor support                           |               |                                  |                                   | .05 (.10)               |
| × Organizational innovation                    |               |                                  |                                   | .05 (.14)               |
| × Organizational structure                     |               |                                  |                                   | .16 (.12)               |
| Work methods autonomy                          |               |                                  |                                   |                         |
| × Supervisor support                           |               |                                  |                                   | -.11 (.09)              |
| × Organizational innovation                    |               |                                  |                                   | -.06 (.10)              |
| × Organizational structure                     |               |                                  |                                   | .03 (.11)               |
| Decision-making autonomy                       |               |                                  |                                   |                         |
| × Supervisor support                           |               |                                  |                                   | .10 (.08)               |
| × Organizational innovation                    |               |                                  |                                   | -.09 (.08)              |
| × Organizational structure                     |               |                                  |                                   | .08 (.08)               |
| <b>Variance components</b>                     |               |                                  |                                   |                         |
| Intercept                                      | .41***        | .45***                           | .51***                            | .51***                  |
| Work scheduling autonomy                       |               |                                  | .38***                            | .38***                  |
| Work methods autonomy                          |               |                                  | .30***                            | .30***                  |
| Decision-making autonomy                       |               |                                  | .19***                            | .19***                  |
| Organizational openness                        |               |                                  | .22***                            | .22***                  |
| Participation in decision-making               |               |                                  | .38***                            | .38***                  |
| Formalization                                  |               |                                  | .22***                            | .22***                  |
| <b>Additional information</b>                  |               |                                  |                                   |                         |
| ICC                                            | .23           |                                  |                                   |                         |
| -2 log likelihood FIML                         | 5100          | 4684                             | 4455                              | 4445                    |
| Number of estimated parameters                 | 3             | 12                               | 39                                | 48                      |
| Model comparison $\chi^2$ (Degrees of Freedom) |               |                                  | 228.45 (27)***                    | 10.66 (36)              |

2 *Note:* ICC = Intraclass correlation; FIML = full information maximum likelihood estimation; L1  
3 = Level 1; L2 = Level 2. L1  $n = 1,544$  and L2 sample size = 193. Values in parentheses are  
4 standard errors. \*  $p < .05$ , \*\*  $p < .01$ , \*\*\*  $p < .001$ .
