# Supplementary material for: Contextual work design and employee innovative work behavior: When does autonomy matter?
Source: PubMed Central journal article supplement (PMC6171839; doi:10.1371/journal.pone.0204089), 2018-10-04
Supplement: pone.0204089.s004.pdf [file pone.0204089.s004.pdf]

1 **S4 Table. HLM results for “Retail and Wholesale” (n = 127).**

| Level and Variable                             | Model         |                                     |                                      |                            |
|------------------------------------------------|---------------|-------------------------------------|--------------------------------------|----------------------------|
|                                                | Null          | Random Intercept<br>and Fixed Slope | Random Intercept<br>and Random Slope | Cross-Level<br>Interaction |
| <b>Level 1</b>                                 |               |                                     |                                      |                            |
| Intercept                                      | 4.43*** (.07) | 4.43*** (.07)                       | 4.43*** (.07)                        | 4.43*** (.07)              |
| Work scheduling autonomy                       |               | .31*** (.07)                        | .31*** (.07)                         | .31*** (.07)               |
| Work methods autonomy                          |               | .38*** (.07)                        | .38*** (.07)                         | .38*** (.07)               |
| Decision-making autonomy                       |               | .34*** (.07)                        | .34*** (.07)                         | .34*** (.07)               |
| Organizational openness                        |               | .26*** (.07)                        | .26*** (.07)                         | .26*** (.07)               |
| Participation in decision-making               |               | .37*** (.07)                        | .37*** (.07)                         | .37*** (.07)               |
| Formalization                                  |               | .22*** (.07)                        | .22*** (.07)                         | .22*** (.07)               |
| <b>Level 2 (Intercept)</b>                     |               |                                     |                                      |                            |
| Supervisor support                             |               | .25 (.14)                           | .22 (.13)                            | .26 (.12)                  |
| Organizational innovation                      |               | -.21 (.15)                          | -.18 (.14)                           | -.20 (.13)                 |
| Organizational structure                       |               | -.03 (.14)                          | .01 (.13)                            | .01 (.11)                  |
| <b>Cross-level interactions</b>                |               |                                     |                                      |                            |
| Work scheduling autonomy                       |               |                                     |                                      |                            |
| × Supervisor support                           |               |                                     |                                      | -.11 (.15)                 |
| × Organizational innovation                    |               |                                     |                                      | -.26 (.16)                 |
| × Organizational structure                     |               |                                     |                                      | .26 (.21)                  |
| Work methods autonomy                          |               |                                     |                                      |                            |
| × Supervisor support                           |               |                                     |                                      | .14 (.12)                  |
| × Organizational innovation                    |               |                                     |                                      | -.28 (.15)                 |
| × Organizational structure                     |               |                                     |                                      | .12 (.12)                  |
| Decision-making autonomy                       |               |                                     |                                      |                            |
| × Supervisor support                           |               |                                     |                                      | -.25* (.10)                |
| × Organizational innovation                    |               |                                     |                                      | .08 (.11)                  |
| × Organizational structure                     |               |                                     |                                      | .00 (.12)                  |
| <b>Variance components</b>                     |               |                                     |                                      |                            |
| Intercept                                      | .40***        | .41***                              | .48***                               | .48***                     |
| Work scheduling autonomy                       |               |                                     | .86***                               | .86***                     |
| Work methods autonomy                          |               |                                     | .23***                               | .23***                     |
| Decision-making autonomy                       |               |                                     | .36***                               | .36***                     |
| Organizational openness                        |               |                                     | .18***                               | .18***                     |
| Participation in decision-making               |               |                                     | .20***                               | .20***                     |
| Formalization                                  |               |                                     | .15***                               | .15***                     |
| <b>Additional information</b>                  |               |                                     |                                      |                            |
| ICC                                            | .24           |                                     |                                      |                            |
| -2 log likelihood FIML                         | 3309          | 3176                                | 3005                                 | 2979                       |
| Number of estimated parameters                 | 3             | 12                                  | 39                                   | 48                         |
| Model comparison $\chi^2$ (Degrees of Freedom) |               |                                     | 170.20 (27)***                       | 25.96 (21)                 |

2 *Note:* ICC = Intraclass correlation; FIML = full information maximum likelihood estimation; L1  
3 = Level 1; L2 = Level 2. L1  $n = 1,016$  and L2 sample size = 127. Values in parentheses are  
4 standard errors. \*  $p < .05$ , \*\*  $p < .01$ , \*\*\*  $p < .001$ .
