# Supplementary material for: Contextual work design and employee innovative work behavior: When does autonomy matter?
Source: PubMed Central journal article supplement (PMC6171839; doi:10.1371/journal.pone.0204089), 2018-10-04
Supplement: pone.0204089.s005.pdf [file pone.0204089.s005.pdf]

1 **S1 Appendix. Survey questions incl. conjoint profile (original language and English).**

- 2 • Welches ist Ihr berufsqualifizierender Abschluss?  
3 ○ Abgeschlossene Berufsausbildung  
4 ○ Studium (Fachhochschule oder Universität)  
5 ○ (Noch) keine abgeschlossene Berufsausbildung  
6 • What is your highest professional qualification?  
7 ○ Apprenticeship/vocational training  
8 ○ Academic studies  
9 ○ Professional qualification not (yet) finished  
10 • Arbeiten Sie in Vollzeit oder Teilzeit?  
11 ○ Vollzeit  
12 ○ Teilzeit mit ...%  
13 ○ Ich bin (aktuell) nicht berufstätig  
14 • Are you currently employed full-time or part-time?  
15 ○ Full-time  
16 ○ Part-time at ...%  
17 ○ I'm (currently) not employed  
18 • Bitte geben Sie an wieviele Mitarbeiter derzeit in Ihrem Unternehmen (in  
19 Deutschland) beschäftigt sind  
20 ○ 1 bis 10  
21 ○ 11 bis 499  
22 ○ 500 bis 5,000  
23 ○ Mehr als 5,000  
24 • Please indicate how many employees work in your company (in Germany)  
25 ○ 1 to 10 employees  
26 ○ 11 to 499 employees  
27 ○ 500 to 5,000 employees  
28 ○ More than 5,000 employees  
29 • Bitte geben Sie ihr Geschlecht an  
30 ○ Weiblich  
31 ○ Männlich  
32 • Please indicate your gender  
33 ○ Female  
34 ○ Male  
35 • Bitte geben Sie Ihr Alter an  
36 ○ [... Jahre]  
37 • Please indicate your age  
38 ○ [... years]  
39 • In welcher Branche ist Ihr derzeitiges Unternehmen primär tätig?  
40 ○ Dienstleistungen  
41 ○ Verarbeitendes Gewerbe  
42 ○ Öffentliche Verwaltung  
43 ○ Transport, Kommunikation, Energie  
44 ○ Finanz-, Versicherungs-, und Immobilienwirtschaft  
45 ○ Baugewerbe

- 46                   ○ Bergbau
- 47                   ○ Landwirtschaft, Forstwirtschaft, Fischerei
- 48                   ○ Großhandel
- 49                   ○ Einzelhandel
- 50                   ○ Sonstiges, nämlich: ...
- 51                   ○ Keine Angabe
- 52                   • In which industry is your current company primarily operating?
- 53                   ○ Services
- 54                   ○ Manufacturing
- 55                   ○ Public administration
- 56                   ○ Transport, communication, energy
- 57                   ○ Financial, insurance, property and real estate
- 58                   ○ Construction
- 59                   ○ Mining
- 60                   ○ Agriculture, forestry, fishery
- 61                   ○ Wholesale
- 62                   ○ Retail
- 63                   ○ Other, as follows: ...
- 64                   ○ No indication
- 65                   • In welchem Unternehmensbereich bzw. in welcher Unternehmensfunktion sind Sie
- 66                   derzeit tätig?
- 67                   ○ Einkauf/Beschaffung
- 68                   ○ Logistik
- 69                   ○ Produktion
- 70                   ○ Forschung und Entwicklung
- 71                   ○ Personalwesen
- 72                   ○ Finanzen
- 73                   ○ Marketing/Vertrieb/Kommunikation
- 74                   ○ Informationstechnik (IT)
- 75                   ○ Verwaltung
- 76                   ○ Management
- 77                   ○ Sonstiges, nämlich: ...
- 78                   ○ Keine Angabe
- 79                   • In which department / function are you currently working?
- 80                   ○ Procurement/purchasing
- 81                   ○ Logistics
- 82                   ○ Production
- 83                   ○ Research and development
- 84                   ○ Human resources
- 85                   ○ Finance
- 86                   ○ Marketing/Sales/Communication
- 87                   ○ IT
- 88                   ○ Administration
- 89                   ○ Management
- 90                   ○ Other, as follows: ...
- 91                   ○ No indication

- 92 • Wie lange sind Sie schon berufstätig?
- 93     ○ [Jahre] [Monate]
- 94 • For how long are you already working?
- 95     ○ [Years] [Months]
- 96 • Wie lange arbeiten Sie bereits in Ihrem jetzigen Unternehmen?
- 97     ○ [Jahre] [Monate]
- 98 • For how long are you already working in your current company?
- 99     ○ [Years] [Months]
- 100 • Tragen Sie Personalverantwortung?
- 101     ○ Ja, ich trage für ... Mitarbeiter Personalverantwortung
- 102     ○ Nein
- 103     ○ Keine Angabe
- 104 • Do you currently have staff responsibility?
- 105     ○ Yes, I'm responsible for ... employees
- 106     ○ No
- 107     ○ No indication

108  
109  
110 [Conjoint profiles, 2 x 8 profile sets]

111  
112 Inwiefern trägt ein Arbeitsumfeld mit dem genannten Profil zu Ihrem innovativen  
113 Verhalten\* im Job bei?

- 114  
115 1 Trägt gar nicht dazu bei
- 116 2
- 117 3
- 118 4
- 119 5
- 120 6
- 121 7 Trägt sehr stark dazu bei

122  
123 *\*Innovatives Verhalten umfasst die Generierung oder die Umsetzung neuer und/oder*  
124  *kreativer Ideen und Herangehensweisen in Ihrer Arbeit, bspw. im Hinblick auf die*  
125  *Verbesserung der Arbeitsqualität, Verbesserung des Kundenservice, ein besseres Produkt,*  
126  *ein besseres Kundenerlebnis, etc.*

| Eigenschaft                                        | Profil                                                                                      |
|----------------------------------------------------|---------------------------------------------------------------------------------------------|
| <b>Einflussnahme auf eigene Arbeitsbedingungen</b> | <b>Selbstbestimmt:</b><br>Arbeitszeit und Arbeitsort sind im Unternehmen frei wählbar.      |
|                                                    | <b>Fremdbestimmt:</b><br>Arbeitszeit und Arbeitsort werden vom Unternehmen vorgegeben.      |
| <b>Experimentierkultur</b>                         | <b>Lernen aus Fehlern:</b><br>Eine Kultur, die es ermöglicht neue Dinge auszuprobieren.     |
|                                                    | <b>Vermeiden von Fehlern:</b><br>Eine Kultur mit klaren Vorgaben, wie Dinge erledigt werden |

|                                                     |                                                                                                                                                                                                                                                                                    |
|-----------------------------------------------------|------------------------------------------------------------------------------------------------------------------------------------------------------------------------------------------------------------------------------------------------------------------------------------|
|                                                     | sollen.                                                                                                                                                                                                                                                                            |
| <b>Führungskultur</b>                               | <b>Vertrauensbasiert:</b><br>Vorgesetzte kontrollieren lediglich das Endergebnis.<br><b>Kontrollbasiert:</b><br>Vorgesetzte kontrollieren stets den Arbeitsfortschritt.                                                                                                            |
| <b>Anpassungsdruck</b>                              | <b>Freiheit man selbst zu sein:</b><br>Mitarbeiter müssen sich nicht anpassen bezüglich Erscheinungsbild, Gewohnheiten, Arbeitsstil, usw.<br><b>Druck sich anpassen zu müssen:</b><br>Mitarbeiter müssen sich anpassen bezüglich Erscheinungsbild, Gewohnheiten, Arbeitsstil, usw. |
| <b>Einflussnahme auf Unternehmensentscheidungen</b> | <b>Demokratisch:</b><br>Wichtige Unternehmensentscheidungen werden von allen Mitarbeitern getroffen ("Bottom-Up").<br><b>Hierarchisch:</b><br>Wichtige Unternehmensentscheidungen werden ausschließlich vom Management getroffen ("Top-Down").                                     |
| <b>Organisationsstruktur</b>                        | <b>Unternehmerisch, flexibel:</b><br>Eine Organisation mit flexiblen Prozessen.<br><b>Bürokratisch, standardisiert:</b><br>Eine Organisation mit standardisierten Prozessen.                                                                                                       |

128  
129  
130  
131  
132  
133  
134  
135  
136  
137  
138  
139  
140  
141  
142  
143  
144  
145

Please indicate, to what extent does a working environment with the following profile contribute to your innovative behavior\* at work:

- 1 Does not contribute at all
- 2
- 3
- 4
- 5
- 6
- 7 Contributes very much

*\*Innovative behavior comprises the generation or the implementation of new and/or creative ideas and approaches in your work, e.g., with regard to the improvement of the quality of your work, improvement of customer service, a better product, a better customer experience, etc.*

| Characteristic                             | Profile                                                                                         |
|--------------------------------------------|-------------------------------------------------------------------------------------------------|
| <b>Influence on own working conditions</b> | <b>Self-determined:</b><br>Working time and working place can be freely chosen by the employee. |
|                                            | <b>Other-determined:</b><br>Working time and working place are determined by the company        |
| <b>Experimental culture</b>                | <b>Learning from mistakes:</b><br>A culture that allows employees to try out new things.        |

|                                       |                                                                                                                                    |
|---------------------------------------|------------------------------------------------------------------------------------------------------------------------------------|
|                                       | <b>Prevention of failure:</b><br>A culture with clear specifications/parameters as to how things have to be done.                  |
| <b>Leadership culture</b>             | <b>Trust-based:</b><br>Supervisors only control employees' final results.                                                          |
|                                       | <b>Control-based:</b><br>Supervisors continually control employees' working progress.                                              |
| <b>Pressure to adjust</b>             | <b>Freedom to be oneself:</b><br>Employees do not need to adjust themselves with regard to appearance, habits, working style, etc. |
|                                       | <b>Pressure to adjust oneself:</b><br>Employees have to adjust themselves with regard to appearance, habits, working style, etc.   |
| <b>Influence on company decisions</b> | <b>Democratic:</b><br>Important company decisions are taken by all employees (bottom-up).                                          |
|                                       | <b>Hierarchical:</b><br>Important company decisions are exclusively taken by the management team (top-down).                       |
| <b>Organizational structure</b>       | <b>Entrepreneurial, flexible:</b><br>An organization with flexible processes.                                                      |
|                                       | <b>Bureaucratic, standardized:</b><br>An organization with standardized processes.                                                 |

146  
147  
148  
149  
150  
151  
152  
153  
154  
155  
156  
157  
158  
159  
160  
161  
162  
163  
164  
165  
166  
167  
168  
169  
170  
171  
172

[Organizational climate dimensions]

[Supervisor support]

Bitte geben Sie im Folgenden an, wie sehr die jeweiligen Aussagen auf Ihr Unternehmen zutreffen bzw. nicht zutreffen:

Please indicate to what extent the following statements apply to the company you are currently working for:

- In diesem Unternehmen sind Vorgesetzte wirklich gut darin die Probleme ihrer Mitarbeiter zu verstehen.
  - 1 Stimme gar nicht zu
  - 2
  - 3
  - 4 Stimme auf jeden Fall zu
  - 5 Weiß nicht / keine Angabe
- Supervisors here are really good at understanding peoples' problems
  - 1 Definitely false
  - 2
  - 3
  - 4 Definitely true
  - 5 Don't know / no indication
- Die Vorgesetzten zeigen, dass sie auf ihre Mitarbeitern vertrauen.
  - 1 Stimme gar nicht zu

- 173                   ○ 2
- 174                   ○ 3
- 175                   ○ 4 Stimme auf jeden Fall zu
- 176                   ○ 5 Weiß nicht / keine Angabe
- 177                   • Supervisors show that they have confidence in those they manage
- 178                   ○ 1 Definitely false
- 179                   ○ 2
- 180                   ○ 3
- 181                   ○ 4 Definitely true
- 182                   ○ 5 Don't know / no indication
- 183                   • Die Vorgesetzten sind freundlich und einfach ansprechbar.
- 184                   ○ 1 Stimme gar nicht zu
- 185                   ○ 2
- 186                   ○ 3
- 187                   ○ 4 Stimme auf jeden Fall zu
- 188                   ○ 5 Weiß nicht / keine Angabe
- 189                   • Supervisors here are friendly and easy to approach
- 190                   ○ 1 Definitely false
- 191                   ○ 2
- 192                   ○ 3
- 193                   ○ 4 Definitely true
- 194                   ○ 5 Don't know / no indication
- 195                   • Man kann auf die Vorgesetzten vertrauen, dass sie ihre Mitarbeiter gut führen.
- 196                   ○ 1 Stimme gar nicht zu
- 197                   ○ 2
- 198                   ○ 3
- 199                   ○ 4 Stimme auf jeden Fall zu
- 200                   ○ 5 Weiß nicht / keine Angabe
- 201                   • Supervisors can be relied upon to give good guidance to people
- 202                   ○ 1 Definitely false
- 203                   ○ 2
- 204                   ○ 3
- 205                   ○ 4 Definitely true
- 206                   ○ 5 Don't know / no indication
- 207                   • Die Vorgesetzten kennen und verstehen ihre Mitarbeiter sehr gut.
- 208                   ○ 1 Stimme gar nicht zu
- 209                   ○ 2
- 210                   ○ 3
- 211                   ○ 4 Stimme auf jeden Fall zu
- 212                   ○ 5 Weiß nicht / keine Angabe
- 213                   • Supervisors show an understanding of the people who work for them
- 214                   ○ 1 Definitely false
- 215                   ○ 2
- 216                   ○ 3
- 217                   ○ 4 Definitely true
- 218                   ○ 5 Don't know / no indication

- 219  
220  
221 [Organizational structure]  
222  
223 Bitte geben Sie im Folgenden an, wie sehr die jeweiligen Aussagen auf Ihr Unternehmen  
224 zutreffen bzw. nicht zutreffen:  
225  
226 Please indicate to what extent the following statements apply to the company you are  
227 currently working for:  
228
- 229 • Es wird in diesem Unternehmen als extrem wichtig angesehen, die Regeln zu  
230 befolgen.
    - 231 ○ 1 Stimme gar nicht zu
    - 232 ○ 2
    - 233 ○ 3
    - 234 ○ 4 Stimme auf jeden Fall zu
    - 235 ○ 5 Weiß nicht / keine Angabe
  - 236 • It is considered extremely important here to follow the rules
    - 237 ○ 1 Definitely false
    - 238 ○ 2
    - 239 ○ 3
    - 240 ○ 4 Definitely true
    - 241 ○ 5 Don't know / no indication
  - 242 • Mitarbeiter können formelle Prozeduren und Regeln ignorieren, wenn es ihnen  
243 dabei hilft ihre Aufgabe zu erledigen.
    - 244 ○ 1 Stimme gar nicht zu
    - 245 ○ 2
    - 246 ○ 3
    - 247 ○ 4 Stimme auf jeden Fall zu
    - 248 ○ 5 Weiß nicht / keine Angabe
  - 249 • People can ignore formal procedures and rules if it helps get the job done
    - 250 ○ 1 Definitely false
    - 251 ○ 2
    - 252 ○ 3
    - 253 ○ 4 Definitely true
    - 254 ○ 5 Don't know / no indication
  - 255 • Alles muss genau nach Vorschrift erledigt werden.
    - 256 ○ 1 Stimme gar nicht zu
    - 257 ○ 2
    - 258 ○ 3
    - 259 ○ 4 Stimme auf jeden Fall zu
    - 260 ○ 5 Weiß nicht / keine Angabe
  - 261 • Everything has to be done by the book
    - 262 ○ 1 Definitely false
    - 263 ○ 2
    - 264 ○ 3

- 265                   ○ 4 Definitely true  
 266                   ○ 5 Don't know / no indication  
 267                   • In diesem Unternehmen ist es nicht erforderlich Vorgehensweisen ganz genau zu  
 268 folgen.  
 269                   ○ 1 Stimme gar nicht zu  
 270                   ○ 2  
 271                   ○ 3  
 272                   ○ 4 Stimme auf jeden Fall zu  
 273                   ○ 5 Weiß nicht / keine Angabe  
 274                   • It's not necessary to follow procedures to the letter around here  
 275                   ○ 1 Definitely false  
 276                   ○ 2  
 277                   ○ 3  
 278                   ○ 4 Definitely true  
 279                   ○ 5 Don't know / no indication  
 280                   • In diesem Unternehmen regt sich niemand übermäßig auf, wenn Regeln gebrochen  
 281 werden.  
 282                   ○ 1 Stimme gar nicht zu  
 283                   ○ 2  
 284                   ○ 3  
 285                   ○ 4 Stimme auf jeden Fall zu  
 286                   ○ 5 Weiß nicht / keine Angabe  
 287                   • Nobody gets too upset if people break the rules around here  
 288                   ○ 1 Definitely false  
 289                   ○ 2  
 290                   ○ 3  
 291                   ○ 4 Definitely true  
 292                   ○ 5 Don't know / no indication

293  
 294 [Organizational innovation]  
 295

296 Bitte geben Sie im Folgenden an, wie sehr die jeweiligen Aussagen auf Ihr Unternehmen  
 297 zutreffen bzw. nicht zutreffen:  
 298

299 Please indicate to what extent the following statements apply to the company you are  
 300 currently working for:  
 301

- 302                   • In diesem Unternehmen werden neue Ideen bereitwillig angenommen.  
 303                   ○ 1 Stimme gar nicht zu  
 304                   ○ 2  
 305                   ○ 3  
 306                   ○ 4 Stimme auf jeden Fall zu  
 307                   ○ 5 Weiß nicht / keine Angabe  
 308                   • New ideas are readily accepted here  
 309                   ○ 1 Definitely false  
 310                   ○ 2



- 311 ○ 3
- 312 ○ 4 Definitely true
- 313 ○ 5 Don't know / no indication
- 314 • Dieses Unternehmen reagiert schnell, wenn Veränderungen erforderlich sind.
- 315 ○ 1 Stimme gar nicht zu
- 316 ○ 2
- 317 ○ 3
- 318 ○ 4 Stimme auf jeden Fall zu
- 319 ○ 5 Weiß nicht / keine Angabe
- 320 • This company is quick to respond when changes need to be made
- 321 ○ 1 Definitely false
- 322 ○ 2
- 323 ○ 3
- 324 ○ 4 Definitely true
- 325 ○ 5 Don't know / no indication
- 326 • Das Management erkennt rasch, wenn Bedarf besteht Dinge anders zu erledigen.
- 327 ○ 1 Stimme gar nicht zu
- 328 ○ 2
- 329 ○ 3
- 330 ○ 4 Stimme auf jeden Fall zu
- 331 ○ 5 Weiß nicht / keine Angabe
- 332 • Management here are quick to spot the need to do things differently
- 333 ○ 1 Definitely false
- 334 ○ 2
- 335 ○ 3
- 336 ○ 4 Definitely true
- 337 ○ 5 Don't know / no indication
- 338 • Dieses Unternehmen ist sehr flexibel; es kann Vorgehensweisen rasch ändern um
- 339 sich neue Gegebenheiten einzustellen und aufkommende Probleme zu lösen.
- 340 ○ 1 Stimme gar nicht zu
- 341 ○ 2
- 342 ○ 3
- 343 ○ 4 Stimme auf jeden Fall zu
- 344 ○ 5 Weiß nicht / keine Angabe
- 345 • This organization is very flexible; it can quickly change procedures to meet new
- 346 conditions and solve problems as they arise
- 347 ○ 1 Definitely false
- 348 ○ 2
- 349 ○ 3
- 350 ○ 4 Definitely true
- 351 ○ 5 Don't know / no indication
- 352 • Unterstützung bei der Entwicklung neuer Ideen ist stets verfügbar.
- 353 ○ 1 Stimme gar nicht zu
- 354 ○ 2
- 355 ○ 3
- 356 ○ 4 Stimme auf jeden Fall zu

- 357                   ○ 5 Weiß nicht / keine Angabe
- 358                   • Assistance in developing new ideas is readily available
- 359                   ○ 1 Definitely false
- 360                   ○ 2
- 361                   ○ 3
- 362                   ○ 4 Definitely true
- 363                   ○ 5 Don't know / no indication
- 364                   • Mitarbeiter in diesem Unternehmen sind stets auf der Suche nach neuen
- 365                   Herangehensweisen für Problemstellungen.
- 366                   ○ 1 Stimme gar nicht zu
- 367                   ○ 2
- 368                   ○ 3
- 369                   ○ 4 Stimme auf jeden Fall zu
- 370                   ○ 5 Weiß nicht / keine Angabe
- 371                   • People in this organization are always searching for new ways of looking at
- 372                   problems
- 373                   ○ 1 Definitely false
- 374                   ○ 2
- 375                   ○ 3
- 376                   ○ 4 Definitely true
- 377                   ○ 5 Don't know / no indication
